# Supplementary material
Source: PubMed Central journal article supplement (PMC9825653)
Supplement: NIHMS1845796-supplement-SUPINFO.pdf [file NIHMS1845796-supplement-SUPINFO.pdf]

## Supporting Information

### **Binding of Human ACE2 and RBD of Omicron Enhanced by Unique Interaction Patterns Among SARS-CoV-2 Variants of Concern**

Seonghan Kim<sup>1</sup>, Yi Liu<sup>1</sup>, Matthew Ziarnik<sup>1</sup>, Sangjae Seo<sup>2</sup>, Yiwei Cao<sup>3</sup>, X. Frank Zhang<sup>1,4\*</sup>, Wonpil Im<sup>1,3\*</sup>

<sup>1</sup>Department of Bioengineering, <sup>2</sup>Korean Institute of Science and Technology Information, Daejeon 34141, Republic of Korea, <sup>3</sup>Departments of Biological Sciences, Chemistry, and Computer Science and Engineering, Lehigh University, 111 Research Dr, Bethlehem, PA 18015, USA

<sup>4</sup>Current address: Department of Biomedical Engineering, University of Massachusetts Amherst, 240 Thatcher Road, Amherst, MA 01003, USA

\*Correspondence and requests for materials should be addressed to X.F.Z and W.I. (emails: frank.zhang@umass.edu and wonpil@lehigh.edu)

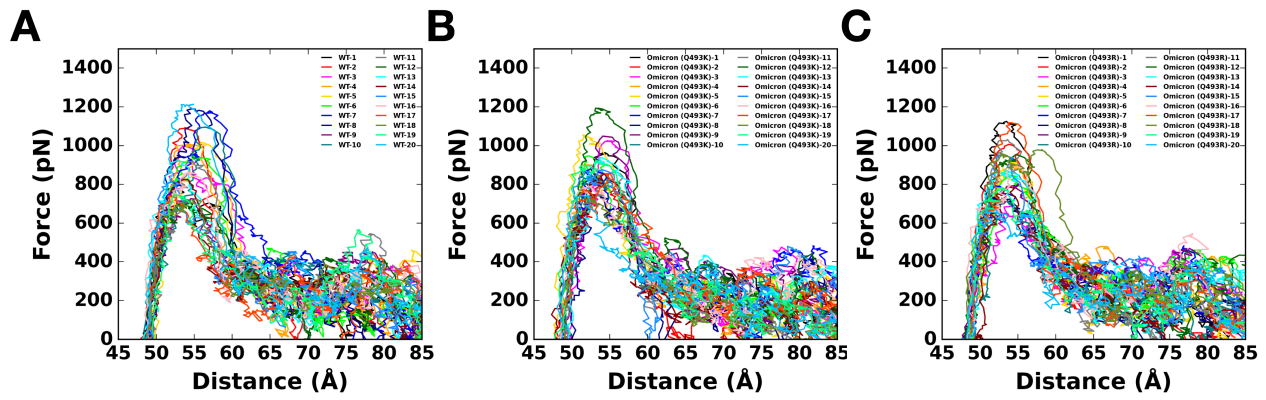

**Figure S1.** Force profiles of 20 replicas of (A) WT, (B) Omicron Q493K, and (C) Omicron Q493R as a function of the distance between the COM of RBD and ACE2.

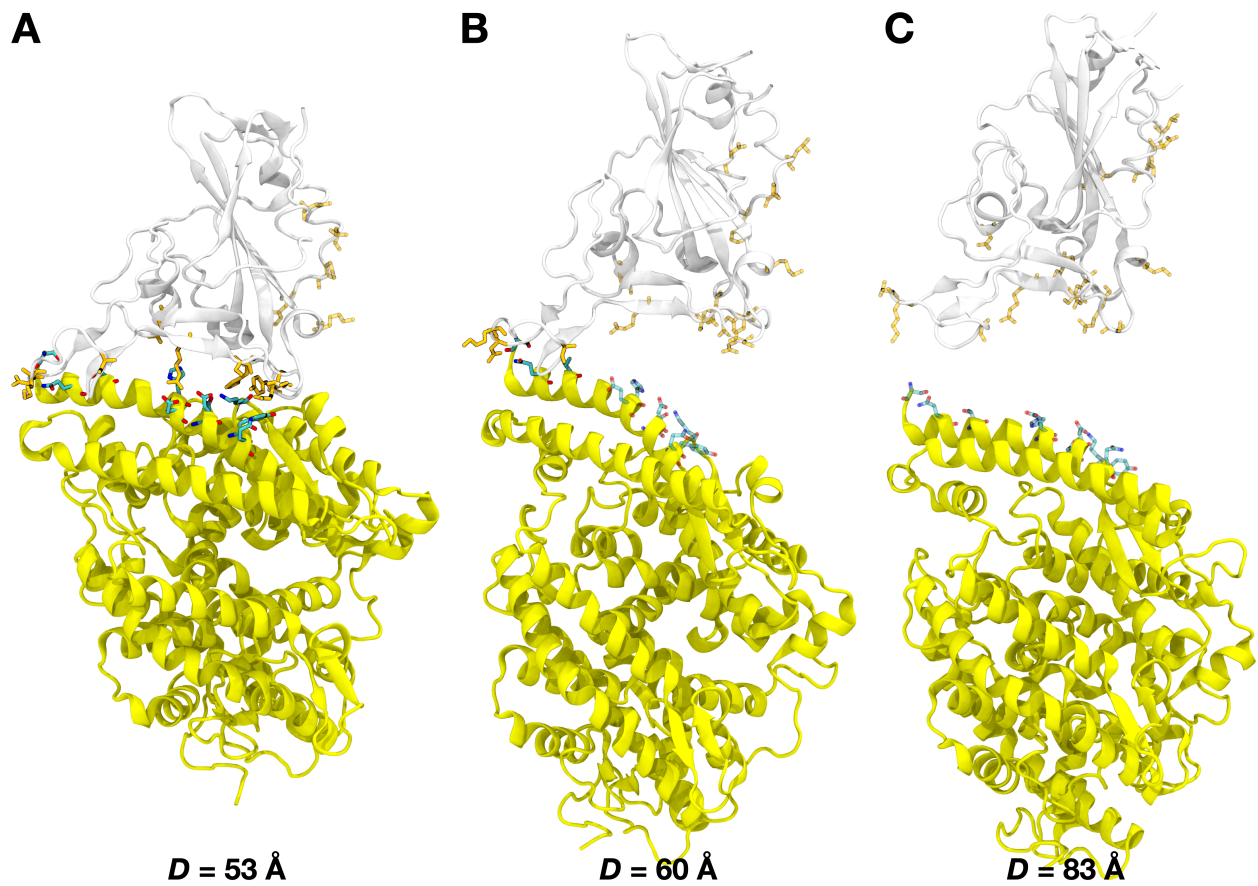

**Figure S2.** Separation process between Omicron RBD and ACE2 at  $D = 53 \text{ \AA}$ ,  $60 \text{ \AA}$ , and  $83 \text{ \AA}$ , respectively. The color scheme is the same as in **Figure 1B**.

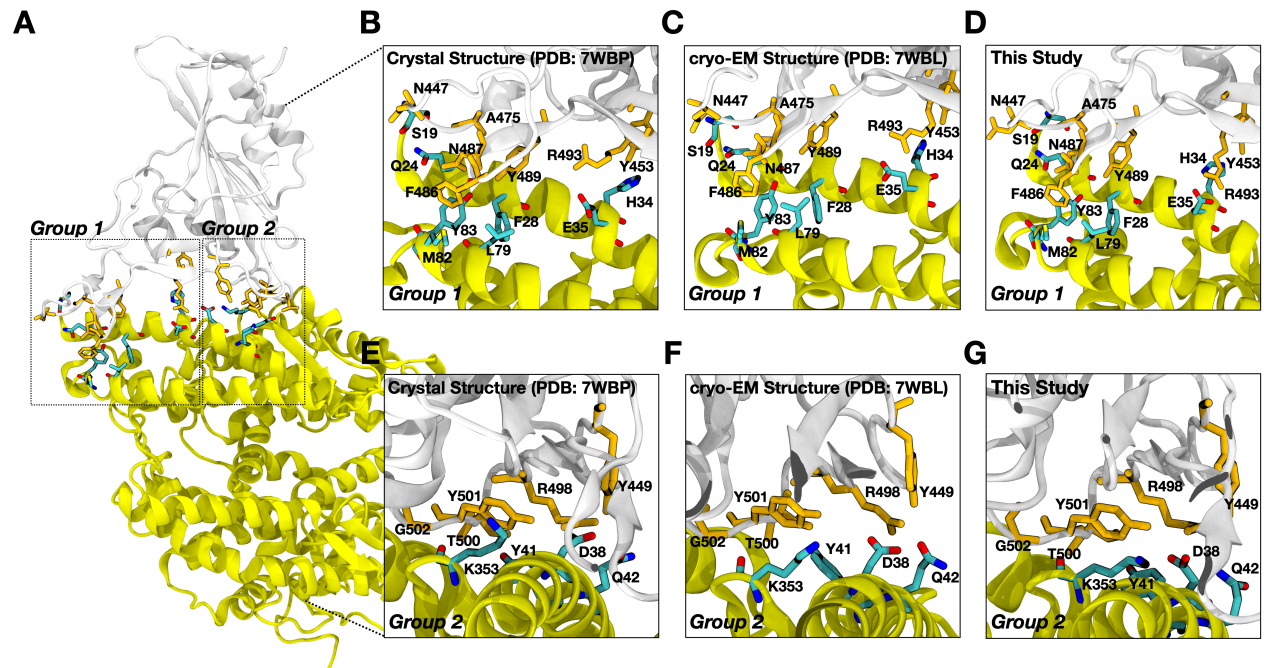

**Figure S3.** Model comparisons between experimentally obtained structures from (B,E) X-ray crystallography (PDB ID: 7WBP), (C,F) cryo-EM (PDB ID: 7WBL), and (D,G) the model used in this work. Residues located in the RBD<sup>Omicron</sup>-ACE2 interface are compared. (A) Two groups are defined and magnified on the right: (B,C,D) for group 1 and (E,F,G) for group2. The color scheme is the same as in **Figure 1B**.

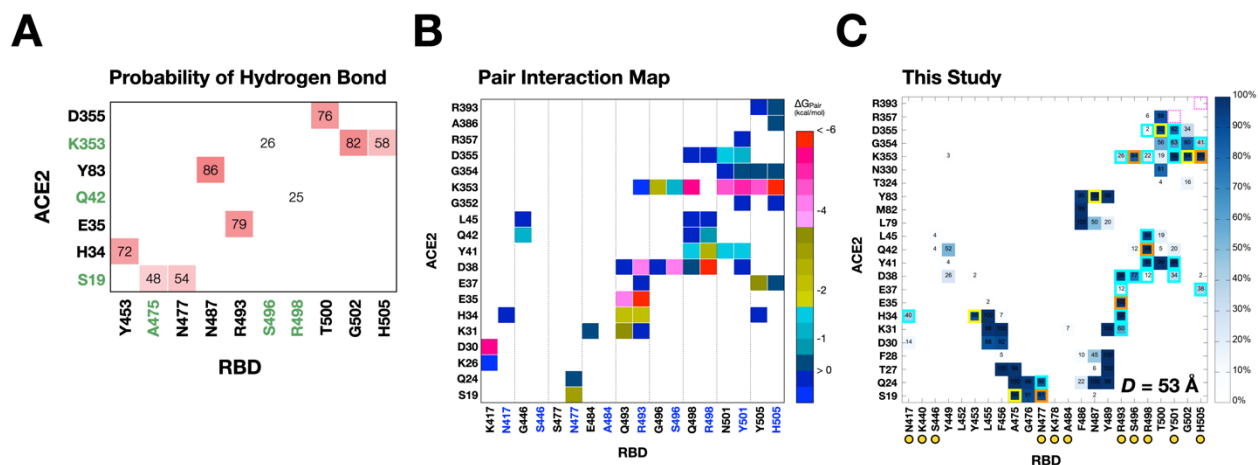

**Figure S4.** Comparison of interaction maps between Omicron RBD and ACE2. **(A)** Probability of hydrogen bonds obtained from 100 ns of simulations started from Omicron RBD cryo-EM structure (PDB ID: 7T9L). The figure was regenerated from the study conducted by Hossen et al.<sup>1</sup>, where the unique interfacial hydrogen bonds found in Omicron are colored in green on the X- and Y-axes. **(B)** Pair interaction map from 500 ns of simulations started after Omicron mutation based on WT RBD X-ray structure (PDB ID: 6M0J). The figure was reproduced from the study by Jawad et al.<sup>2</sup> The residues colored in blue on the X-axis are Omicron residues, and residues colored in black are WT. **(C)** The interaction map from this study. The yellow boxes represent interactions reported by Hossen et al. in **(A)**, the cyan boxes present interactions reported by Jawad et al. in **(B)**, and the orange boxes are interactions reported in both studies. Dotted magenta boxes represent missing weak interactions shown in **(B)**. Interactions reported by Hossen et al. were fully captured. Note that **(A)** and **(B)** show RBD residues only subjected to mutation in Omicron, while **(C)** provides more interaction information caused by key interacting RBD residues in addition to mutated residues addressed in the previous two studies.

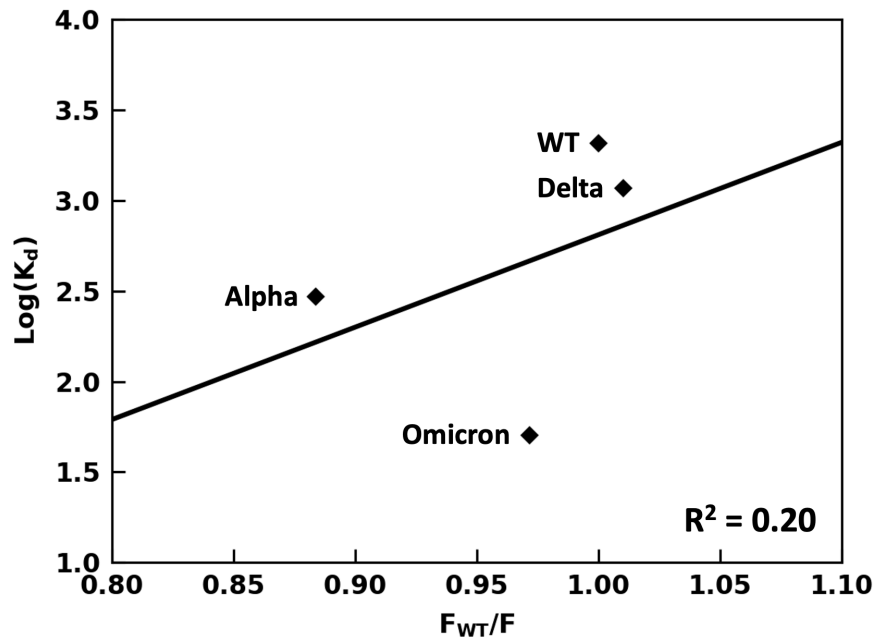

**Figure S5.** Linear regression between MST experiments ( $\text{log}(K_d)$ ) and SMD simulations ( $F_{WT}/F$ ). The  $F_{WT}/F$  is a ratio, where  $F_{WT}$  and  $F$  are the maximum pulling forces of WT and all variants (Alpha, Delta, and Omicron Q493R) from our SMD simulations.

**Table S1.** Comparison of the affinities in  $K_d$  (nM) reported in the current study and other reported in the literature. Abbreviations: SPR, surface plasmon resonance; BLI, biolayer interferometry.

| <b>References</b>       | <b>WT</b> | <b>Alpha</b> | <b>Beta</b> | <b>Delta</b> | <b>Omicron</b> |
|-------------------------|-----------|--------------|-------------|--------------|----------------|
| This study              | 27.5      | 11.8         | 23.1        | 21.5         | 5.50           |
| ref <sup>3</sup> (SPR)  | 8.30      | -            | -           | -            | -              |
| ref <sup>4</sup> (SPR)  | 24.6      | 5.40         | 13.8        | 25.1         | 31.4           |
| ref <sup>5</sup> (SPR)  | 26.3      | 3.64         | 8.10        | -            | -              |
| ref <sup>6</sup> (SPR)  | 44.2      | -            | -           | -            | -              |
| ref <sup>7</sup> (BLI)  | 58.8      | 20.8         | -           | -            | -              |
| ref <sup>8</sup> (SPR)  | 62.6      | 5.50         | 17.4        | -            | -              |
| ref <sup>9</sup> (SPR)  | 68.3      | -            | -           | -            | 24.4           |
| ref <sup>10</sup> (BLI) | 75.1      | 10.7         | -           | -            | -              |
| ref <sup>11</sup> (SPR) | 5.92      | -            | -           | -            | 2.80           |
| ref <sup>12</sup> (SPR) | -         | -            | 7.35        | 2.85         | 8.85           |
| ref <sup>13</sup> (SPR) | 58.6      | 9.56         | 24.9        | -            | 25.7           |
| ref <sup>14</sup> (SPR) | 7.30      | 1.50         | 3.20        | 4.90         | 7.80           |

## REFERENCES

- (1) Hossen, M. L.; Baral, P.; Sharma, T.; Gerstman, B.; Chapagain, P. Significance of the RBD mutations in the SARS-CoV-2 omicron: from spike opening to antibody escape and cell attachment. *Phys. Chem. Chem. Phys.* **2022**, *24*, 9123-9129.
- (2) Jawad, B.; Adhikari, P.; Podgornik, R.; Ching, W. Y. Binding Interactions between Receptor-Binding Domain of Spike Protein and Human Angiotensin Converting Enzyme-2 in Omicron Variant. *J. Phys. Chem. Lett.* **2022**, *13*, 3915-3921.
- (3) Tian, F.; Tong, B.; Sun, L.; Shi, S.; Zheng, B.; Wang, Z.; Dong, X.; Zheng, P. N501Y mutation of spike protein in SARS-CoV-2 strengthens its binding to receptor ACE2. *Elife* **2021**, *10*.
- (4) Han, P.; Li, L.; Liu, S.; Wang, Q.; Zhang, D.; Xu, Z.; Han, P.; Li, X.; Peng, Q.; Su, C.; Huang, B.; Li, D.; Zhang, R.; Tian, M.; Fu, L.; Gao, Y.; Zhao, X.; Liu, K.; Qi, J.; Gao, G. F.; Wang, P. Receptor binding and complex structures of human ACE2 to spike RBD from omicron and delta SARS-CoV-2. *Cell* **2022**, *185*, 630-640 e610.
- (5) Han, P.; Su, C.; Zhang, Y.; Bai, C.; Zheng, A.; Qiao, C.; Wang, Q.; Niu, S.; Chen, Q.; Zhang, Y.; Li, W.; Liao, H.; Li, J.; Zhang, Z.; Cho, H.; Yang, M.; Rong, X.; Hu, Y.; Huang, N.; Yan, J.; Wang, Q.; Zhao, X.; Gao, G. F.; Qi, J. Molecular insights into receptor binding of recent emerging SARS-CoV-2 variants. *Nat. Commun.* **2021**, *12*, 6103.
- (6) Shang, J.; Ye, G.; Shi, K.; Wan, Y.; Luo, C.; Aihara, H.; Geng, Q.; Auerbach, A.; Li, F. Structural basis of receptor recognition by SARS-CoV-2. *Nature* **2020**, *581*, 221-224.
- (7) Lee, J. H.; Lee, Y.; Lee, S. K.; Kim, J.; Lee, C. S.; Kim, N. H.; Kim, H. G. Versatile role of ACE2-based biosensors for detection of SARS-CoV-2 variants and neutralizing antibodies. *Biosens. Bioelectron.* **2022**, *203*, 114034.
- (8) Barton, M. I.; MacGowan, S. A.; Kutuzov, M. A.; Dushek, O.; Barton, G. J.; van der Merwe, P. A. Effects of common mutations in the SARS-CoV-2 Spike RBD and its ligand, the human ACE2 receptor on binding affinity and kinetics. *Elife* **2021**, *10*.
- (9) Cui, Z.; Liu, P.; Wang, N.; Wang, L.; Fan, K.; Zhu, Q.; Wang, K.; Chen, R.; Feng, R.; Jia, Z.; Yang, M.; Xu, G.; Zhu, B.; Fu, W.; Chu, T.; Feng, L.; Wang, Y.; Pei, X.; Yang, P.; Xie, X. S.; Cao, L.; Cao, Y.; Wang, X. Structural and functional characterizations of infectivity and immune evasion of SARS-CoV-2 Omicron. *Cell* **2022**, *185*, 860-871 e813.
- (10) Supasa, P.; Zhou, D.; Dejnirattisai, W.; Liu, C.; Mentzer, A. J.; Ginn, H. M.; Zhao, Y.; Duyvesteyn, H. M. E.; Nutalai, R.; Tuekprakhon, A.; Wang, B.; Paesen, G. C.; Slon-Campos, J.; Lopez-Camacho, C.; Hallis, B.; Coombes, N.; Bewley, K. R.; Charlton, S.; Walter, T. S.; Barnes, E.; Dunachie, S. J.; Skelly, D.; Lumley, S. F.; Baker, N.; Shaik, I.; Humphries, H. E.; Godwin, K.; Gent, N.; Sienkiewicz, A.; Dold, C.; Levin, R.; Dong, T.; Pollard, A. J.; Knight, J. C.; Klenerman, P.; Crook, D.; Lambe, T.; Clutterbuck, E.; Bibi, S.; Flaxman, A.; Bittaye, M.; Belij-Rammerstorfer, S.; Gilbert, S.; Hall, D. R.; Williams, M. A.; Paterson, N. G.; James, W.; Carroll, M. W.; Fry, E. E.; Mongkolsapaya, J.; Ren, J.; Stuart, D. I.; Sreaton, G. R. Reduced neutralization of SARS-CoV-2 B.1.1.7 variant by convalescent and vaccine sera. *Cell* **2021**, *184*, 2201-2211 e2207.
- (11) Lan, J.; He, X.; Ren, Y.; Wang, Z.; Zhou, H.; Fan, S.; Zhu, C.; Liu, D.; Shao, B.; Liu, T.-Y.; Wang, Q.; Zhang, L.; Ge, J.; Wang, T.; Wang, X. *bioRxiv* **2022**.
- (12) Zhang, X.; Wu, S.; Wu, B.; Yang, Q.; Chen, A.; Li, Y.; Zhang, Y.; Pan, T.; Zhang, H.; He, X. SARS-CoV-2 Omicron strain exhibits potent capabilities for immune evasion and viral entrance. *Signal Transduct. Target Ther.* **2021**, *6*, 430.



(13) Cameroni, E.; Bowen, J. E.; Rosen, L. E.; Saliba, C.; Zepeda, S. K.; Culap, K.; Pinto, D.; VanBlargan, L. A.; De Marco, A.; di Iulio, J.; Zatta, F.; Kaiser, H.; Noack, J.; Farhat, N.; Czudnochowski, N.; Havenar-Daughton, C.; Sprouse, K. R.; Dillen, J. R.; Powell, A. E.; Chen, A.; Maher, C.; Yin, L.; Sun, D.; Soriaga, L.; Bassi, J.; Silacci-Fregni, C.; Gustafsson, C.; Franko, N. M.; Logue, J.; Iqbal, N. T.; Mazzitelli, I.; Geffner, J.; Grifantini, R.; Chu, H.; Gori, A.; Riva, A.; Giannini, O.; Ceschi, A.; Ferrari, P.; Cippa, P. E.; Franzetti-Pellanda, A.; Garzoni, C.; Halfmann, P. J.; Kawaoka, Y.; Hebner, C.; Purcell, L. A.; Piccoli, L.; Pizzuto, M. S.; Walls, A. C.; Diamond, M. S.; Telenti, A.; Virgin, H. W.; Lanzavecchia, A.; Snell, G.; Veesler, D.; Corti, D. Broadly neutralizing antibodies overcome SARS-CoV-2 Omicron antigenic shift. *Nature* **2022**, *602*, 664-670.

(14) Dejnirattisai, W.; Huo, J.; Zhou, D.; Zahradnik, J.; Supasa, P.; Liu, C.; Duyvesteyn, H. M. E.; Ginn, H. M.; Mentzer, A. J.; Tuekprakhon, A.; Nutalai, R.; Wang, B.; Dijokaite, A.; Khan, S.; Avinoam, O.; Bahar, M.; Skelly, D.; Adele, S.; Johnson, S. A.; Amini, A.; Ritter, T. G.; Mason, C.; Dold, C.; Pan, D.; Assadi, S.; Bellass, A.; Omo-Dare, N.; Koeckerling, D.; Flaxman, A.; Jenkin, D.; Aley, P. K.; Voysey, M.; Costa Clemens, S. A.; Naveca, F. G.; Nascimento, V.; Nascimento, F.; Fernandes da Costa, C.; Resende, P. C.; Pauvolid-Correa, A.; Siqueira, M. M.; Baillie, V.; Serafin, N.; Kwatra, G.; Da Silva, K.; Madhi, S. A.; Nunes, M. C.; Malik, T.; Openshaw, P. J. M.; Baillie, J. K.; Semple, M. G.; Townsend, A. R.; Huang, K. A.; Tan, T. K.; Carroll, M. W.; Klenerman, P.; Barnes, E.; Dunachie, S. J.; Constantinides, B.; Webster, H.; Crook, D.; Pollard, A. J.; Lambe, T.; Consortium, O.; Consortium, I. C.; Paterson, N. G.; Williams, M. A.; Hall, D. R.; Fry, E. E.; Mongkolsapaya, J.; Ren, J.; Schreiber, G.; Stuart, D. I.; Sreaton, G. R. SARS-CoV-2 Omicron-B.1.1.529 leads to widespread escape from neutralizing antibody responses. *Cell* **2022**, *185*, 467-484 e415.
